# Supplementary material
Source: PubMed Central journal article supplement (PMC3308827)
Supplement: supp_M111.302802_jbc.M111.302802-1.pdf [file supp_M111.302802_jbc.M111.302802-1.pdf]

**SUPPLEMENTAL FIGURE 1. Ephrin-A stimulation of hippocampal neurons promotes shaft synapse formation at 45 minutes and 4 hours but does not alter spine density at 10 minutes, 45 minutes or 4 hours.** Percent shaft synapses (A) and spine density (B) observed at different time points after ephrin-A treatment. (\*\*p<0.01, \*p<0.05, unpaired t-test)

**SUPPLEMENTAL FIGURE 2. SSH(CS) increases phospho-cofilin levels in COS7 cells and SSH1 RNAi reduces SSH1 levels in HT22 cells.** A. COS7 cells were transfected with control pcDNA3, SSHwt, or SSH(CS) expression vectors and phospho-cofilin levels detected by Western blot. SSH(CS) increased the level of phospho-cofilin. B, Transfection of siRNAs for SSH1 reduced the amount of SSH1 protein in HT22 cells after 72 hours.
