# Supplementary material
Source: PubMed Central journal article supplement (PMC3308827)

**A**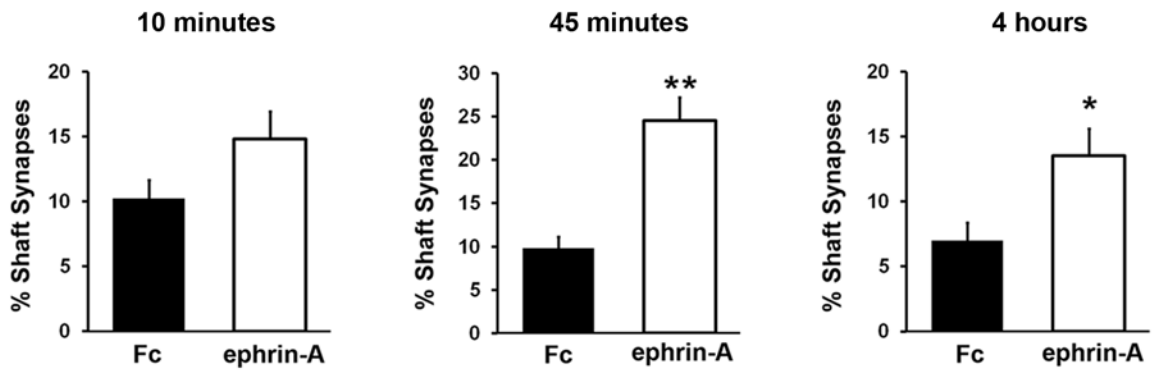**B**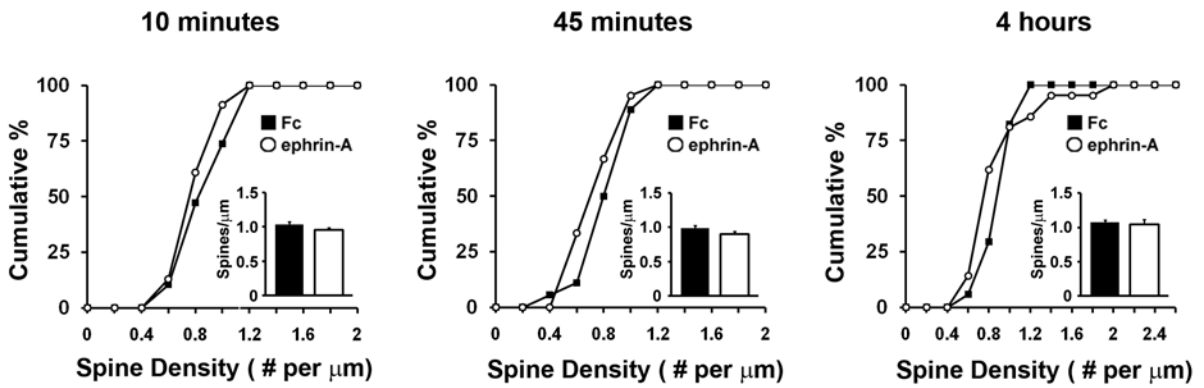

Supplement: supp_M111.302802_jbc.M111.302802-2.pdf [file supp_M111.302802_jbc.M111.302802-2.pdf]

**A**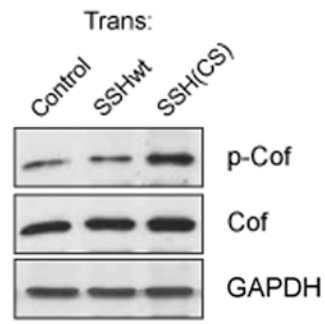**B**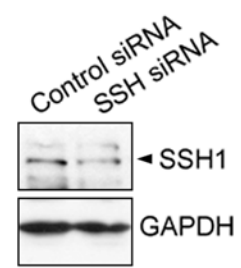**C**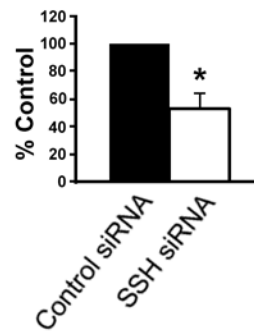

Supplement: supp_M111.302802_jbc.M111.302802-3.pdf [file supp_M111.302802_jbc.M111.302802-3.pdf]
